# Supplementary material for: Recycling and Conversion of Yeasts into Organic Nitrogen Sources for Wine Fermentation: Effects on Molecular and Sensory Attributes
Source: MDPI journal article supplement (doi:10.3390/fermentation7040313), 2021-12-14
Supplement: s1 [file s1]

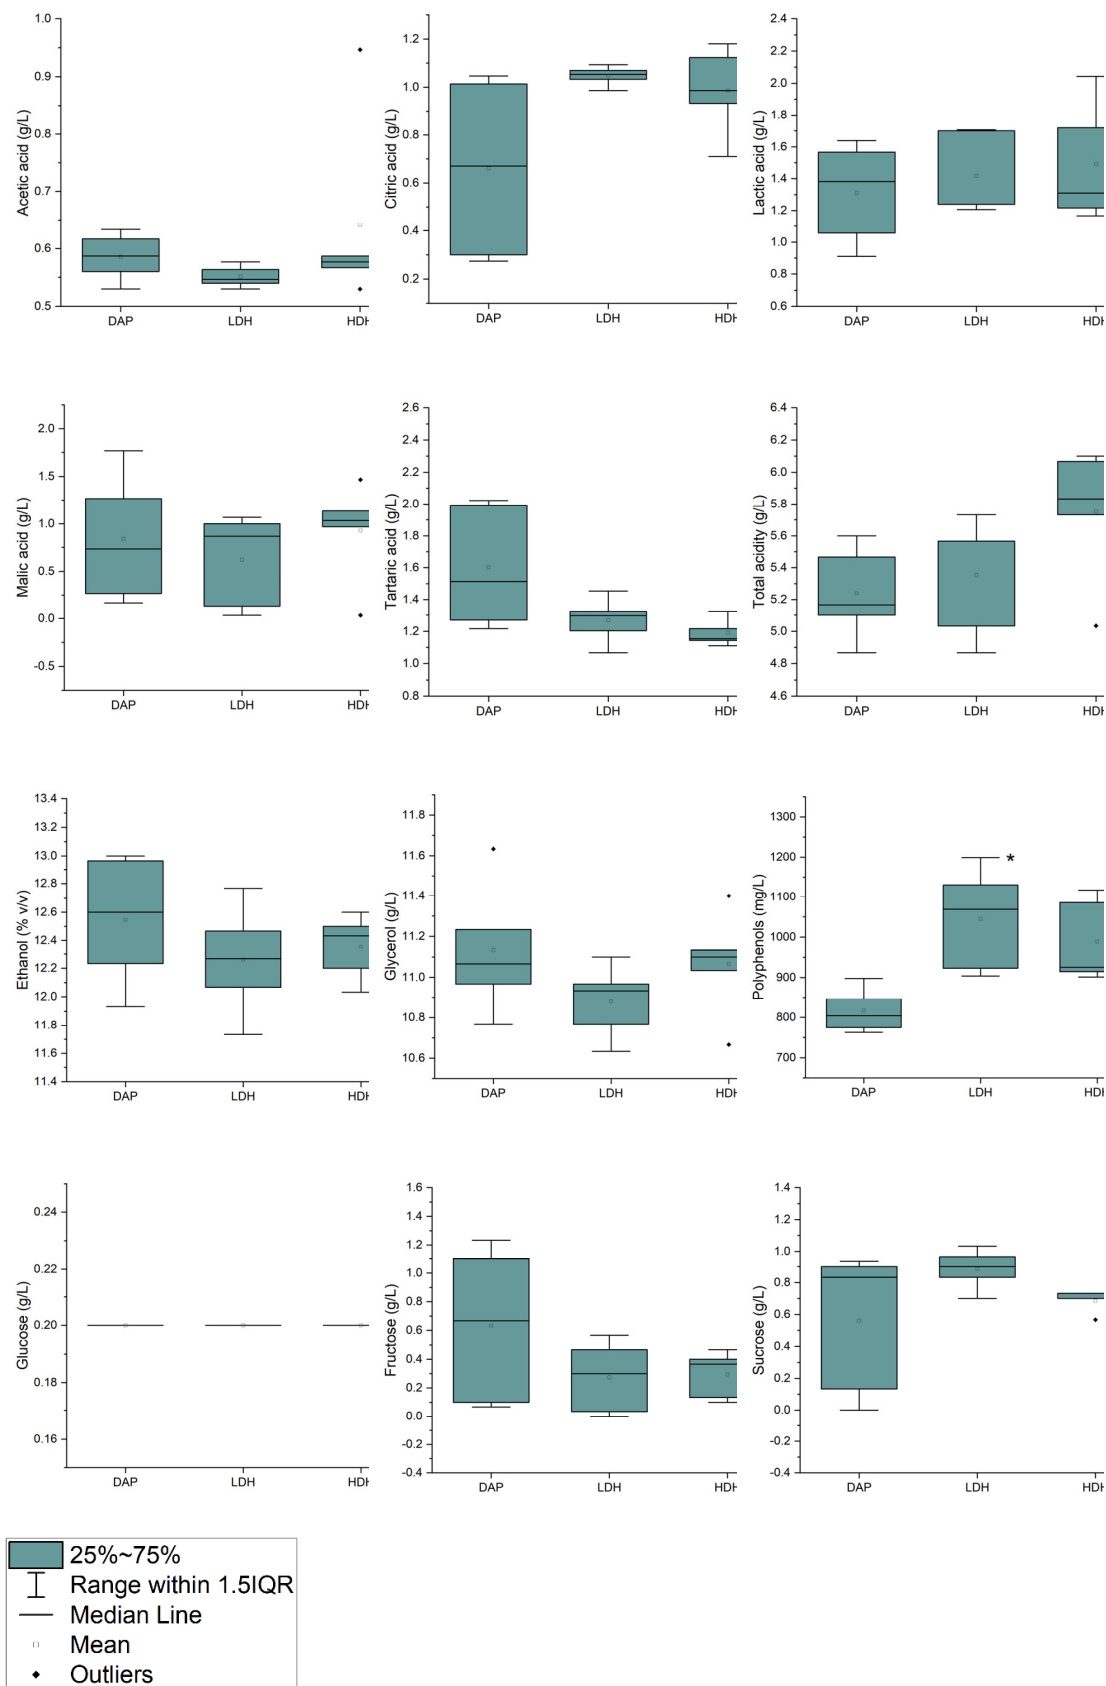

**Figure S1.** Box charts for acids, sugars and alcohols obtained from FTIR analysis.

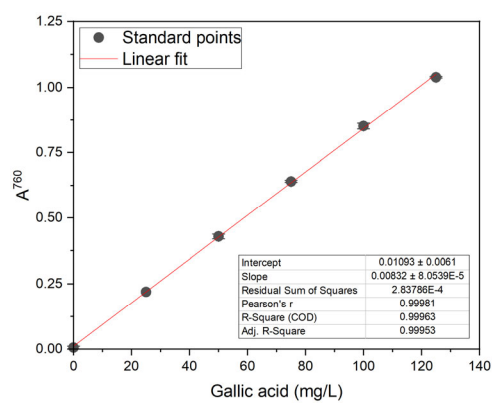

**Figure S2.** Calibration curve for polyphenols analysis using gallic acid as standard.
